# Supplementary material for: Single-cell transcriptional profiling of human thymic stroma uncovers novel cellular heterogeneity in the thymic medulla
Source: PubMed Central journal article supplement (PMC7889611; doi:10.1038/s41467-021-21346-6), 2021-02-17
Supplement: 41467_2021_21346_MOESM1_ESM.pdf [file 41467_2021_21346_MOESM1_ESM.pdf]

## **Supplementary Information**

### **Single-cell transcriptional profiling of human thymic stroma uncovers novel cellular heterogeneity in the thymic medulla**

Jhoanne L. Bautista, Nathan T. Cramer, Corey N. Miller, Jessica Chavez, David I. Berrios, Lauren E. Byrnes, Joe Germino, Vasilis Ntranos, Julie B. Sneddon, Trevor D. Burt, James M. Gardner, Chun J. Ye, Mark S. Anderson, Audrey V. Parent

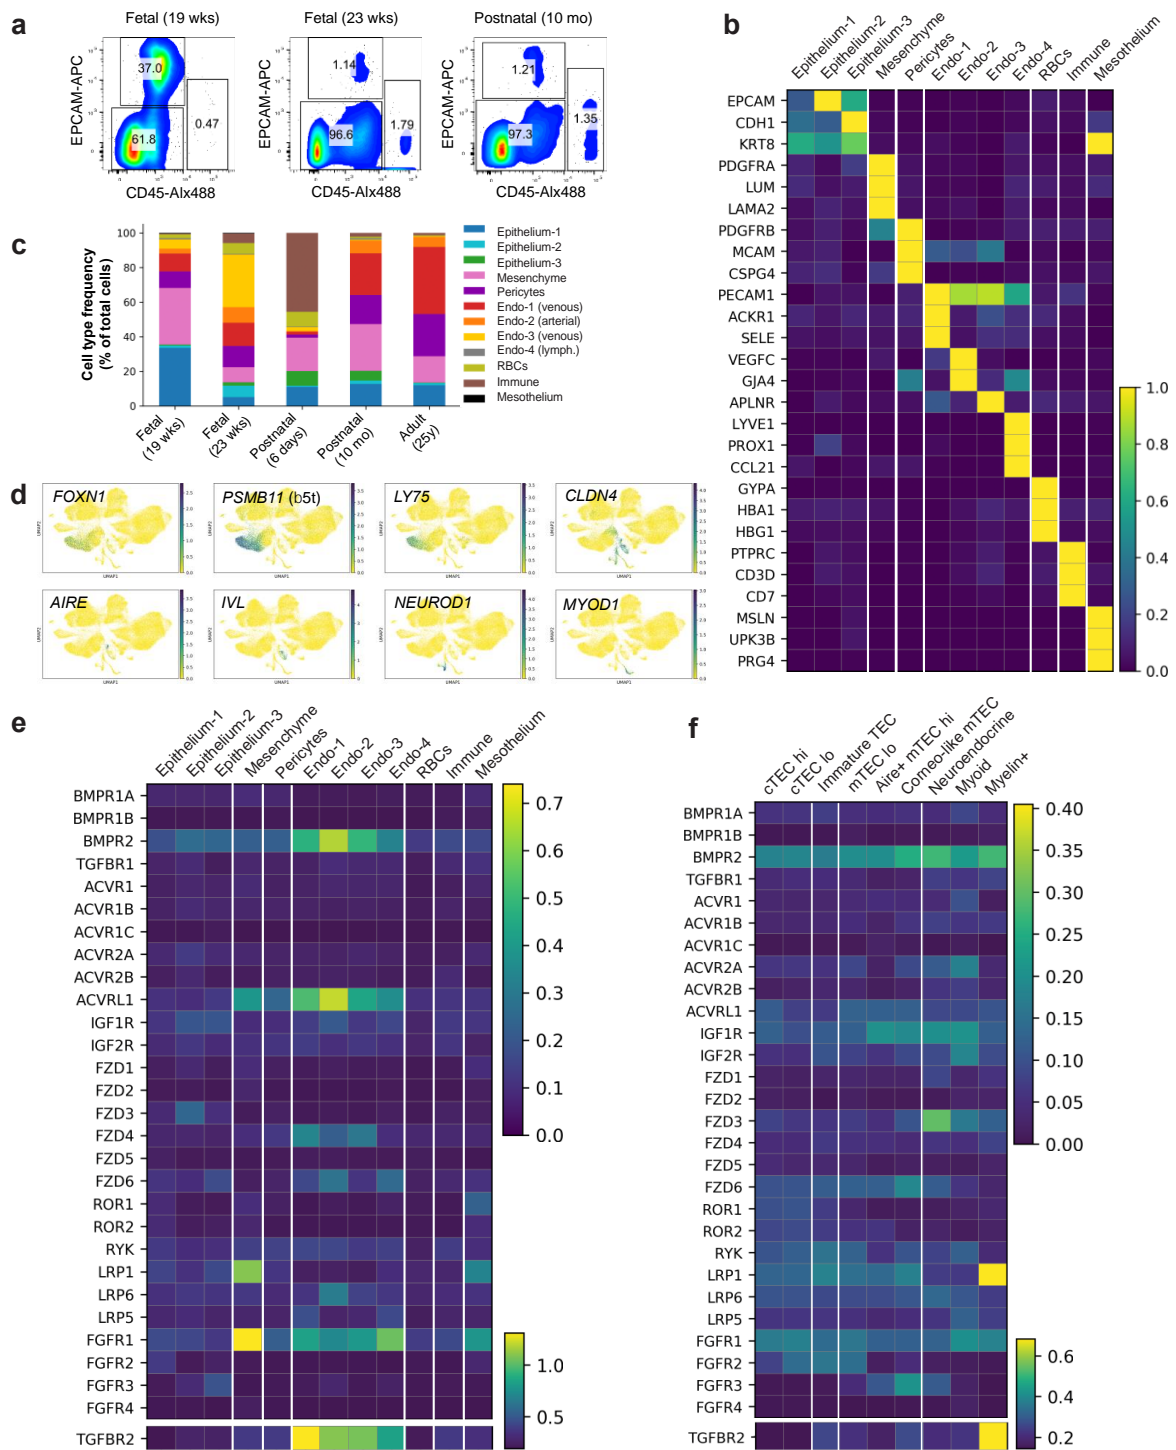

**Supplementary Figure 1. a.** Flow cytometric analysis of single cell preparations after digestion and enrichment of stromal cells. **b.** Heatmap showing the expression of marker genes for each subset of cells. **c.** Stacked bar graph of cell type frequency in each sample. Source data are provided as a Source Data file. **d.** UMAP visualization of markers for TECs and other epithelial subsets. **e-f.** Heatmap showing the expression of WNT, BMP, TGF beta, IGF, and FGF receptors in all subpopulations (**e**) or in TEC subsets (**f**).

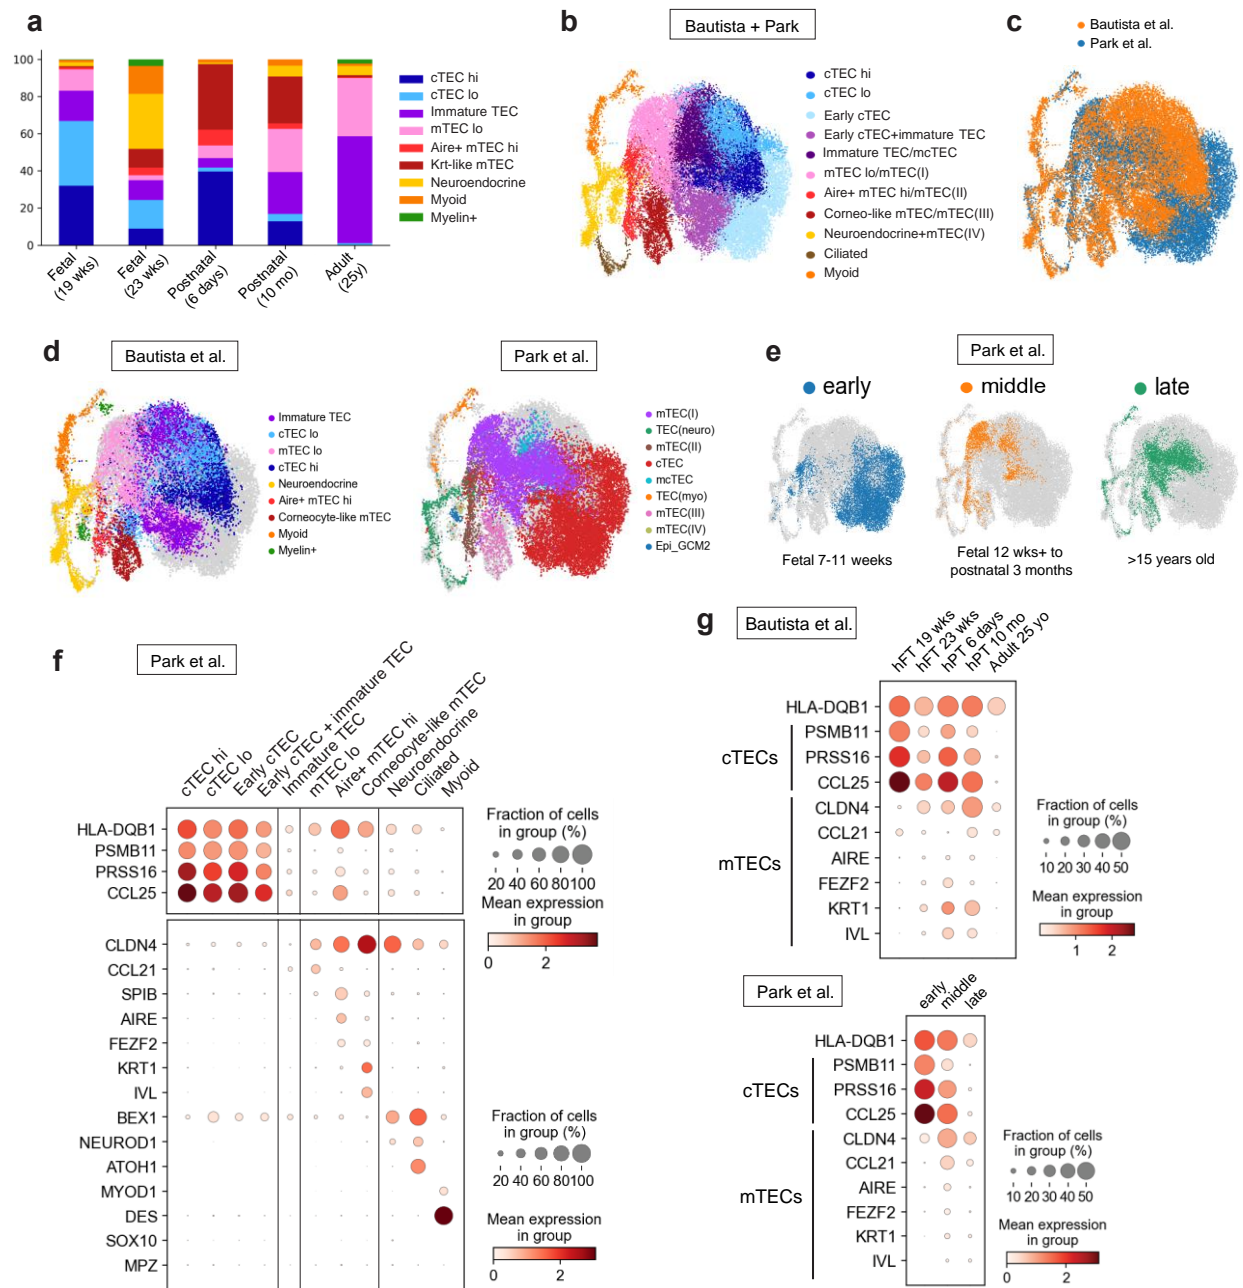

**Supplementary Figure 2. a.** Stacked bar graph of epithelial subset frequency in each sample. Source data are provided as a Source Data file. **b-c.** UMAP visualization of epithelial subsets from the combined Bautista + Park dataset colored by cell type (**b**) or source (**c**). UMAP visualization of epithelial subsets from this study (Bautista et al.) or the Park et al. study. **d.** UMAP visualization of the Bautista and Park et al. subsets colored by cell type. **e.** UMAP visualization of the Park et al. subsets colored by stage (early: fetal 7-11 weeks, middle: fetal 12 wks+ to postnatal 3 months, late: more than 15 years old). **f.** Dot plot showing the expression of known marker genes in the Park et al. dataset. **g.** Dot plot depicting the expression of cTEC and mTEC markers in human fetal thymus (hFT), human postnatal thymus (hPT) or adult thymus in both datasets.

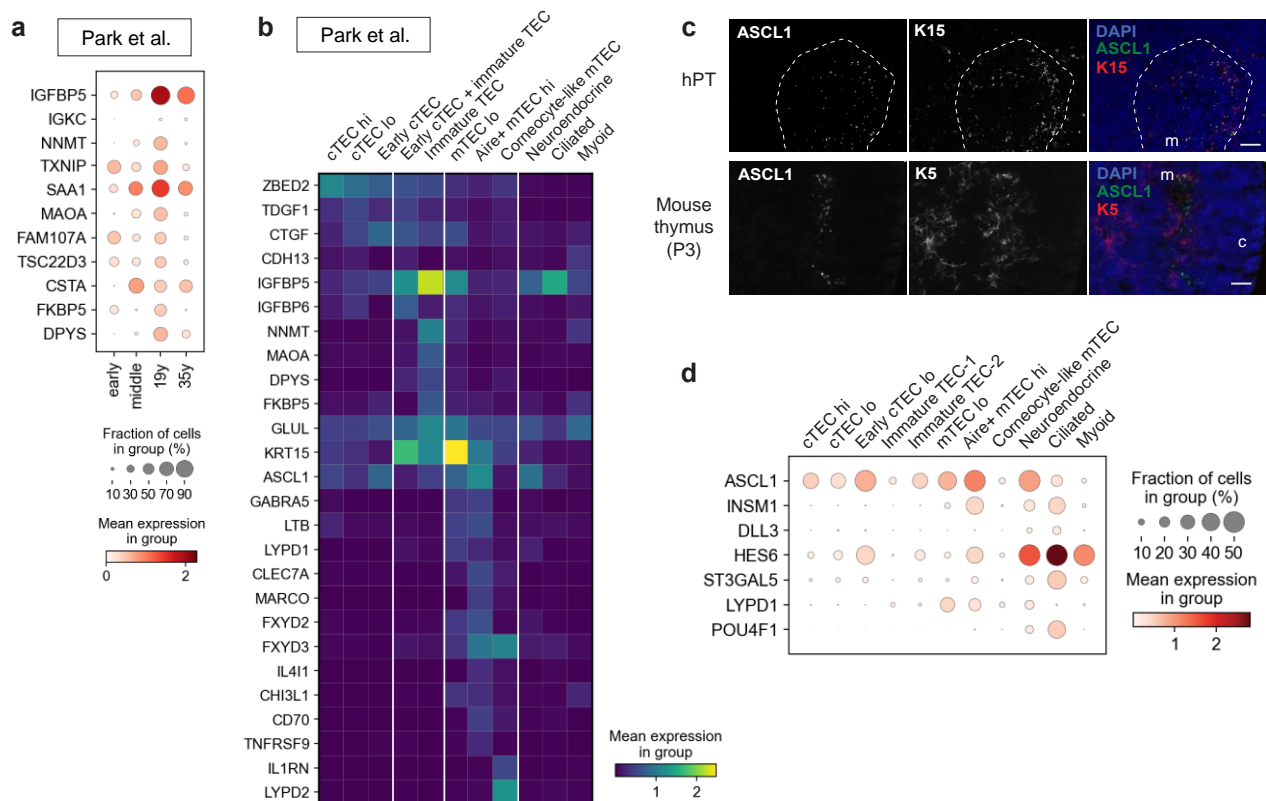

**Supplementary Figure 3. a.** Dot plot showing immature TEC gene expression across age groups in the Park et al. dataset. **b.** Heatmap of the expression of new TEC markers in the Park et al. dataset. **c.** Immunofluorescence analysis of ASCL1 in human postnatal thymus (hPT) and mouse neonatal thymus indicating that its expression is restricted to the medulla. Scale bars, 100  $\mu\text{m}$  (top panel) and 50  $\mu\text{m}$  (lower panel). Staining was repeated three times with similar results. **d.** Dot plot showing the expression of ASCL1 target genes in epithelial subsets of the combined Bautista + Park dataset.

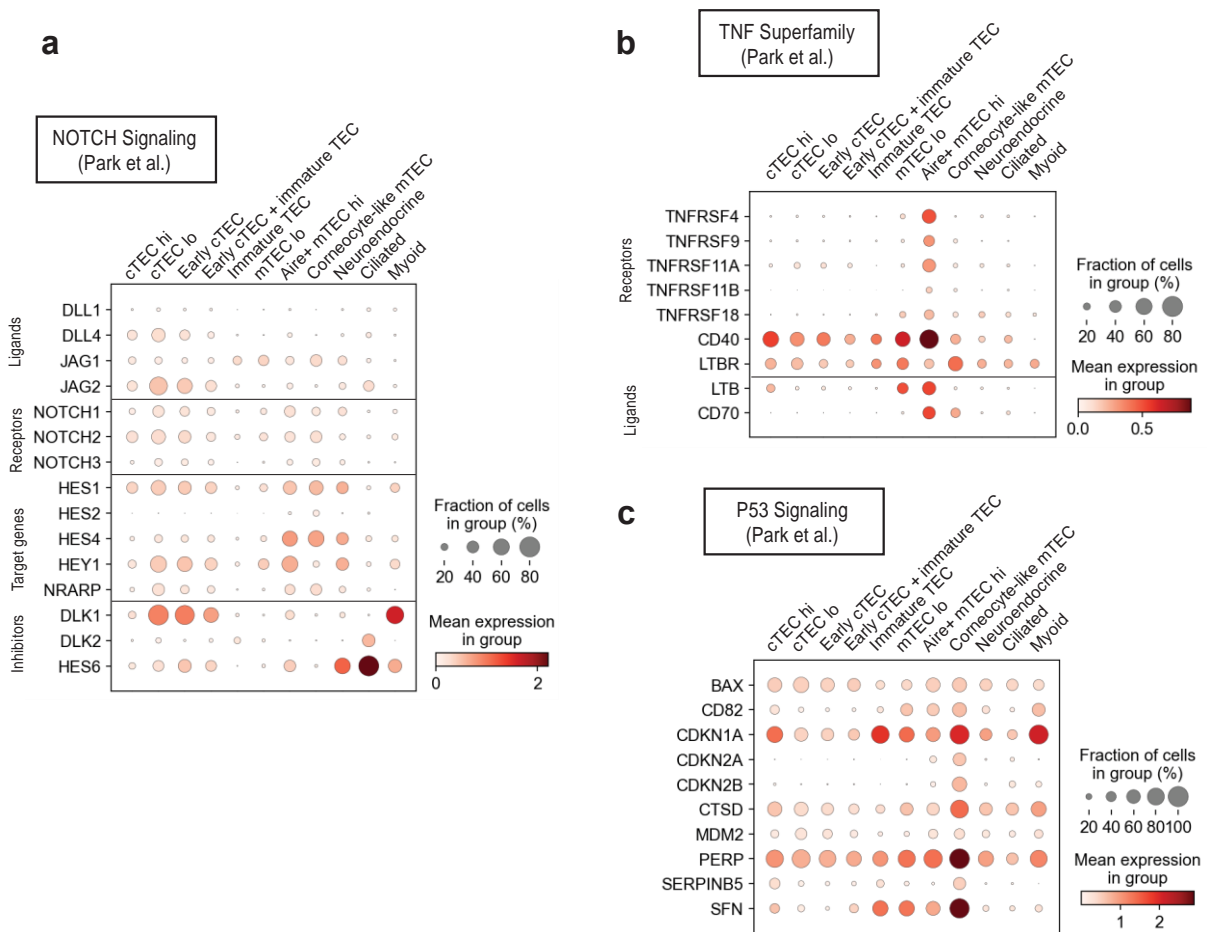

**Supplementary Figure 4. a.** Dot plot depicting the relative level of expression of Notch signaling ligands, receptors, target genes, and inhibitors in epithelial subsets from the Park et al. dataset. **b-c.** Dot plots depicting the relative level of expression of selected TNF Superfamily (**b**) or p53 signaling pathway (**c**) genes in the Park et al. dataset.

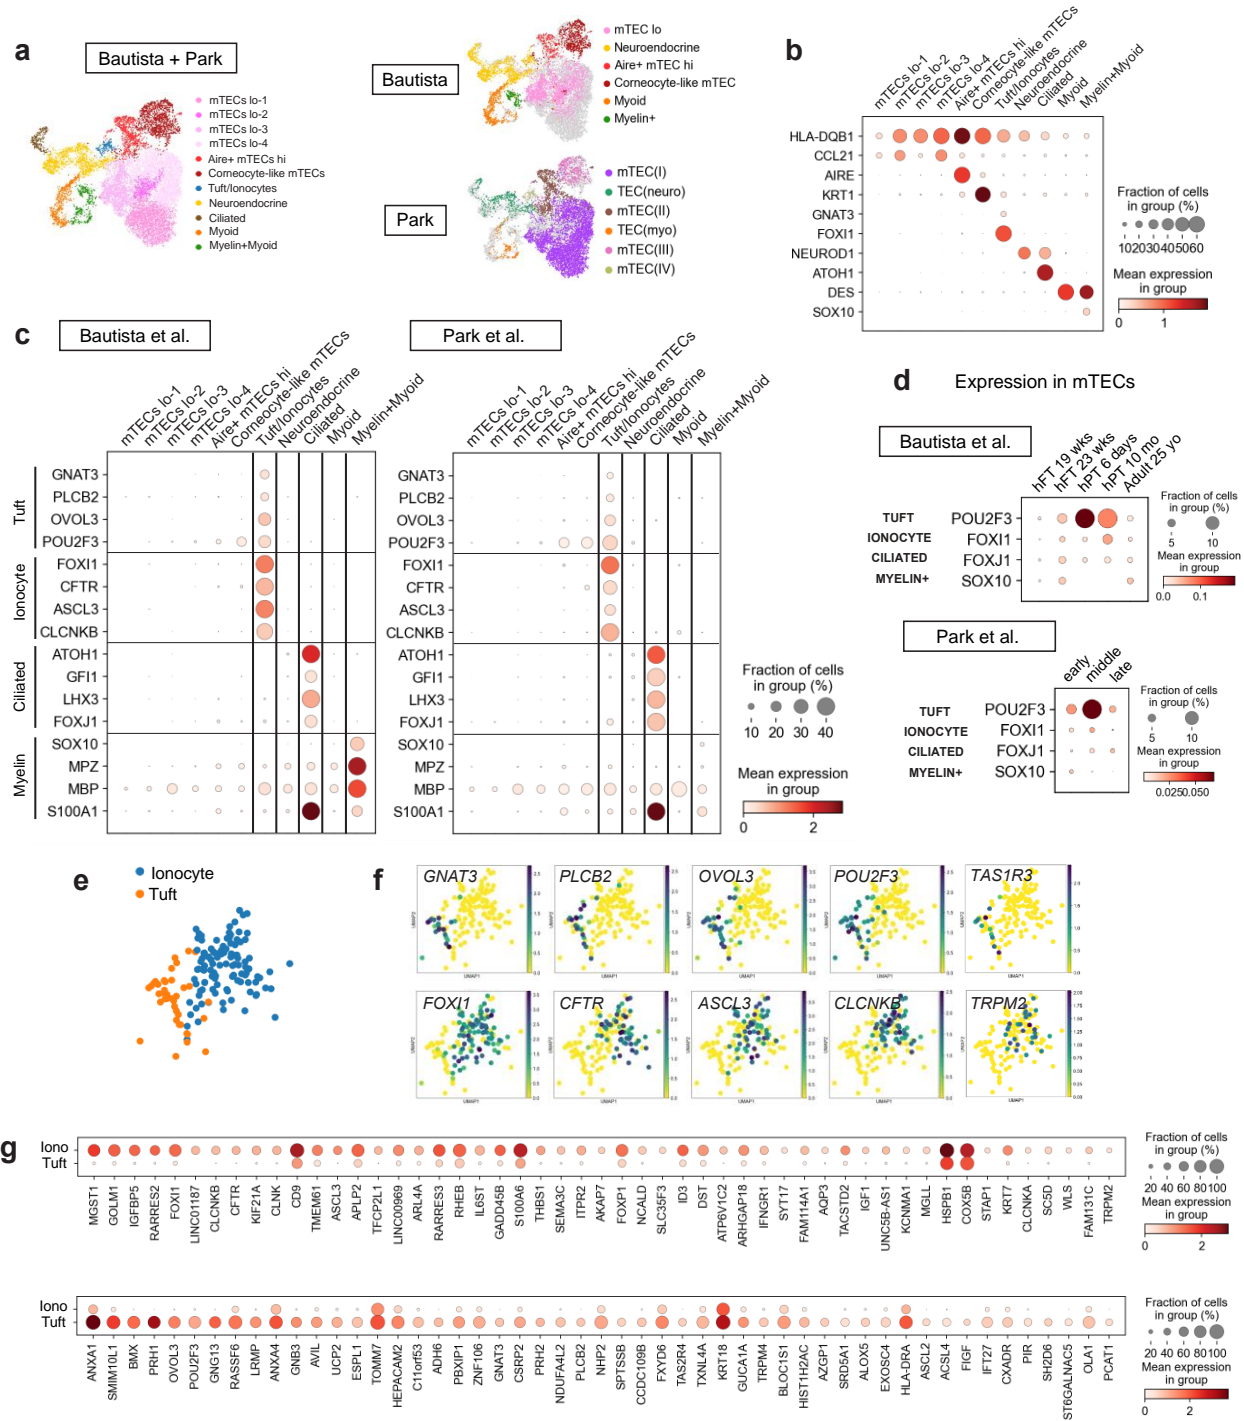

**Supplementary Figure 5. a.** UMAP visualization of Bautista + Park combined medullary epithelial subsets colored by cell type. Epithelial subsets from this study (Bautista et al.) or the Park et al. study are also shown. **b.** Dot plot showing the expression of known marker genes in the combined dataset. **c.** Dot plot showing the expression of tuft, ionocytes, ciliated, and myelin-expressing markers in each dataset. **d.** Dot plot showing the expression of tuft, ionocytes, ciliated, and myelin-expressing markers in each age group. **e.** UMAP visualization of the tuft/ionocyte cluster colored by cell type. **f.** UMAP visualization of tuft and ionocytes marker genes. **g.** Dot plots showing the expression of newly identified tuft and ionocytes markers in each subset.

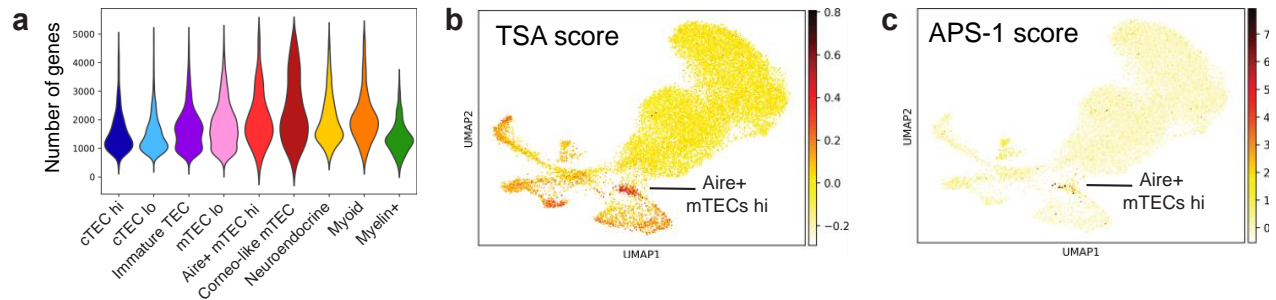

**Supplementary Figure 6.** **a.** Violin plot depicting the number of genes per cell for each epithelial cluster. **b-c.** UMAP visualization of the average expression of tissue-specific antigens (TSA score) (**b**) or antigens eliciting auto-antibodies in APS-1 patients (**c**) in epithelial cells.

**Supplementary Table 1.** List of primary antibodies used in this study.

| Antibody                  | Manufacturer | Catalog number | Dilution |
|---------------------------|--------------|----------------|----------|
| EPCAM APC                 | BioLegend    | 324208         | 1:100    |
| CD45 Alx488               | BioLegend    | 304017         | 1:100    |
| CD11c PE-Cy7              | BioLegend    | 117318         | 1:200    |
| CD45 PerCP                | BioLegend    | 103130         | 1:200    |
| EpCAM APC-Cy7             | BioLegend    | 118218         | 1:200    |
| I-Ab eFluor450            | eBiosciences | 48-5320-82     | 1:200    |
| KRT8-Alx488               | Abcam        | ab192467       | 1:500    |
| KRT8-Alx647               | Abcam        | ab192468       | 1:500    |
| KRT5-Alx488               | Abcam        | ab193894       | 1:500    |
| KRT5-Alx647               | Abcam        | ab193895       | 1:500    |
| KRT15-Alx555              | Abcam        | ab214393       | 1:500    |
| KRT10-Alx647              | Abcam        | ab194231       | 1:500    |
| KRT5                      | Abcam        | ab53121        | 1:500    |
| KRT15                     | Abcam        | ab80522        | 1:200    |
| Fibronectin               | Sigma        | F3648          | 1:200    |
| CFTR                      | R&D Systems  | MAB25031       | 1:100    |
| DESMIN                    | Dako         | M0760          | 1:100    |
| Synaptophysin             | Biogenex     | AM363          | 1:100    |
| ASCL1                     | Abcam        | ab74065        | 1:100    |
| AIRE                      | eBiosciences | 14-9534-82     | 1:100    |
| SOX2                      | R&D Systems  | AF2018         | 1:100    |
| wide spectrum cytokeratin | Abcam        | ab9377         | 1:200    |
| CD8-Alx488                | BioLegend    | 300916         | 1:50     |
| CD4-Alx647                | BioLegend    | 300520         | 1:50     |
| CDH13                     | R&D Systems  | AF3264         | 1:150    |
| TRPM2                     | Alomone labs | ACC-043        | 1:100    |
| HES1                      | Abcam        | ab108937       | 1:300    |
